# 1 Seroprevalence of anti-SARS coronavirus 2 antibodies in 2 Thai adults during the first three epidemic waves

3  
4 Hatairat Lerdsamran<sup>1</sup>, Anek Mungaomklang<sup>2</sup>, Sapon Iamsirithaworn<sup>3</sup>, Jarunee Prasertsopon<sup>1</sup>,  
5 Witthawat Wiriyarat<sup>4</sup>, Suthee Saritsiri<sup>5</sup>, Ratikorn Anusornatanawat<sup>6</sup>, Nirada Siriyakorn<sup>7</sup>, Poj  
6 Intalapaporn<sup>7</sup>, Somrak Sirikhetkon<sup>2</sup>, Kantima Sangsiriwut<sup>8</sup>, Worawat Dangsakul<sup>9</sup>, Suteema  
7 Sawadpongpan<sup>1</sup>, Nattakan Thinpan<sup>1</sup>, Pilailuk Okada<sup>9</sup>, Ranida Techasuwan<sup>3</sup>, Noparat  
8 Mongkalagoon<sup>3</sup>, Kriengkrai Prasert<sup>10</sup>, Pilaipan Puthavathana<sup>1\*</sup>

9  
10 <sup>1</sup> Faculty of Medical Technology, Mahidol University, Nakhon Pathom, Thailand

11 <sup>2</sup> Institute for Urban Disease Control and Prevention, Department of Disease Control, Ministry of  
12 Public Health, Bangkok, Thailand

13 <sup>3</sup> Department of Disease Control, Ministry of Public Health, Nonthaburi, Thailand

14 <sup>4</sup> Faculty of Veterinary Science, Mahidol University, Nakhon Pathom, Thailand

15 <sup>5</sup> The 67<sup>th</sup> Public Health Center Thaweewatthana, Department of Health, Bangkok Metropolitan  
16 Administration, Bangkok, Thailand

17 <sup>6</sup> Chaophraya Yommarat Hospital, Office of the Permanent Secretary, Ministry of Public Health,  
18 Suphanburi, Thailand

19 <sup>7</sup> Rajavithi Hospital, Department of Medical Services, Ministry of Public Health, Bangkok,  
20 Thailand

21 <sup>8</sup> Department of Preventive and Social Medicine, Faculty of Medicine Siriraj Hospital, Mahidol  
22 University, Bangkok, Thailand

23 <sup>9</sup> Department of Medical Science, Ministry of Public Health, Nonthaburi, Thailand

24 <sup>10</sup> Nakhon Phanom Provincial Hospital, Department of Medical Services, Ministry of Public  
25 Health, Nakhon Phanom, Thailand

26

27 \*Corresponding author

28 E-mail: [pilaipan.put@mahidol.edu](mailto:pilaipan.put@mahidol.edu) (PP)

29

## 30 **Abstract**

31 This study sought to determine the anti-SARS-CoV-2 antibody status of 4111 Thai people from  
32 May 2020 to April 2021, a period which spanned the first two and part of the third epidemic wave  
33 of the COVID-19 in Thailand. Participants comprised 142 COVID-19 patients, 2113 individuals  
34 at risk due to their occupations [health personnel, airport officers, public transport drivers, and  
35 workers in entertainment venues (pubs, bars and massage parlors)], 1856 individuals at risk due to  
36 sharing workplaces or living communities with COVID-19 patients, and 553 Thai citizens  
37 returning after extended periods in countries with a high disease prevalence. All sera were tested  
38 in a microneutralization assay and a chemiluminescence immunoassay (CLIA) for IgG against the  
39 N protein. Furthermore, we performed an immunofluorescence assay to resolve discordant results  
40 between the two assays. Antibody responses developed in 88% (15 of 17) of COVID-19 patients  
41 at 8 days and in 94-100% between 15 and 60 days after disease onset. Neutralizing antibodies  
42 persisted for at least 8 months, longer than the IgG did, against the N protein. None of the health  
43 providers, airport officers, and public transport drivers were seropositive, while the antibodies  
44 were present in 0.44% of entertainment workers. This study showed the seropositivity of 1.9, 1.5,  
45 and 7.5% during the 3 epidemic waves, respectively, in Bangkok residents who were at risk due

46 to sharing workplaces or communities with COVID-19 patients. Also, antibody prevalence was  
47 1.3% in Chiang Mai people during the first epidemic wave, and varied between 6.5 and 47.0% in  
48 Thais returning from high-risk countries. This serosurveillance study found a low infection rate of  
49 SARS-CoV-2 in Thailand before the emergence of the Delta variant in late May 2021. The findings  
50 support the Ministry of Public Health's data, which are based on numbers of patients and contact  
51 tracing.

52 **Key words:** SARS-coronavirus-2, seroepidemiology, microneutralization assay, ELISA,  
53 chemiluminescence assay, immunofluorescence assay, Thailand

54

## 55 **Introduction**

56 On 13 January 2020, Thailand was the first country to report a confirmed coronavirus  
57 disease-19 (COVID-19) case outside of China. The first indigenous case in Thailand occurred on  
58 30 January 2020 in a local taxi driver who had no history of traveling abroad; investigation  
59 suggested that he was exposed to the severe acute respiratory syndrome coronavirus-2 (SARS-  
60 CoV-2) by a group of Chinese tourist passengers [1]. As of November 2021, Thailand had  
61 experienced 4 epidemic waves associated with different SARS-CoV-2 variants which emerged  
62 during the pandemic (Fig 1).

63

64 **Fig 1. Situation of SARS-CoV-2 infection in Thailand during March 1, 2020 through**  
65 **December 21, 2021.**

66

67 According to the Department of Disease Control (DDC), Ministry of Public Health  
68 (MOPH), the first epidemic wave began in January 2020, peaked in March-April, gradually

69 declined, and ended on 14 December 2020. Large clusters occurring during this wave had linkages  
70 with attending boxing stadiums or entertainment venues in Bangkok. The strains causing this wave  
71 belonged to clades L, S, O, V, and G likely reflecting multiple introductions of virus into the  
72 country through tourism. The second wave was shorter, lasting from 15 December 2020 to 31  
73 March 2021. This epidemic wave began among Myanmar migrant workers in a seafood market in  
74 Mahachai District, Samut Sakorn Province, 37 km south of Bangkok. The causative virus belonged  
75 to the GH clade (G614 mutation) which was circulating in Myanmar during the second epidemic  
76 wave since August 2020 [2]. The third epidemic wave in Thailand began on 1 April 2021, again  
77 in nightlife entertainment venues, and might be linked to the introduction of the Alpha variant  
78 (B.1.1.7) by the Thai people returning from Cambodia in the middle of March 2021 [3]. The Alpha  
79 variant had spread throughout Cambodia, particularly in Phnom Penh, since February 2021 [4].  
80 The Alpha variant spread to many parts of Thailand in the second week of April due to movement  
81 of large numbers of people during the annual Songkran or water festival (the traditional Thai new  
82 year). Subsequently, the Delta variant, first detected among workers in a big construction camp at  
83 Laksi, Bangkok, on 7 May 2021 [5], spread countrywide seeding the fourth epidemic wave and  
84 caused loss of control of the epidemic.

85 People infected with SARS-CoV-2 may develop antibodies targeting multiple viral  
86 proteins, regardless of whether they have symptoms or not. Therefore, serosurveillance was an  
87 important tool for estimating the magnitude and monitoring the epidemic, especially since  
88 asymptomatic cases were common. A meta-analysis showed that as many as 35% of cases were  
89 asymptomatic [6]. Serological data can also show the duration of antibody responses to COVID-  
90 19 infection, indicating partial protection from re-infection. Studies in Europe and the US have  
91 shown that neutralizing antibodies persist in a majority of COVID-19 cases for up to 13 months

92 after infection [7], and patients with severe disease exhibited a higher level of neutralizing  
93 antibodies than those with milder disease symptoms [8]. The present study conducted a cross-  
94 sectional serosurveillance of anti-SARS-CoV-2 in Thai people in various risk groups in Bangkok  
95 and Chiang Mai Province from May 2020 to May 2021 (the duration spanned the first, second,  
96 and part of the third epidemic waves). The serological techniques used in this study included a  
97 microneutralization (microNT) assay, a chemiluminescence immunoassay (CLIA), and an indirect  
98 immunofluorescence assay (IFA).

99

## 100 **Material and methods**

### 101 **Ethical statement**

102 Usage of human sera from participants of age older than 18 received approval from the  
103 Mahidol University Central Institutional Review Board (MU-CIRB) under protocol number MU-  
104 COVID2020.001/2503.

### 105 **Study sites**

106 Bangkok, the capital of Thailand, and Chiang Mai Province, 696 km north of Bangkok,  
107 were chosen as study sites due to their popularity as travel destinations, high population densities,  
108 and the high numbers of SARS-CoV-2-infected cases.

### 109 **Study population**

110 The study involved 4111 serum samples from 4 groups of participants, as follows. 1)  
111 Anonymized archival serum samples from COVID-19 patients with no information of disease  
112 severity (Sera were the leftover samples from clinical laboratory investigations). 2) People at risk  
113 due to their occupations (health personnel, airport drivers, public transport drivers, and workers in

114 entertainment venues (e.g., pubs, bars, and massage parlors). 3) People at risk due to sharing  
115 workplaces or communities with COVID-19 patients. In the enrollment process for participants in  
116 groups 2 and 3, epidemiologists explained the purpose of the study to obtain written consent for  
117 interviewing about their demographics, occupation, workplace, residence, and general health  
118 condition, including a donation of 5-8 ml of blood, with specimens labeled using ID codes. 4) Thai  
119 citizens in state quarantines, when arrived Thailand after extended duties in countries with known  
120 SARS-CoV-2 outbreaks. Blood specimens were collected for anti-SARS-CoV-2 antibody testing  
121 [along with real-time reverse transcription-polymerase chain reaction (RT-PCR)] to support active  
122 case surveillance activities conducted by the Institute for Urban Disease Control and Prevention  
123 (IUDC), DDC, MoPH. For this group, an ethical review was waived under the authorization of the  
124 DDC, MOPH, as part of the emergency public health response to the pandemic. Nevertheless,  
125 participants received explanations and gave verbal consent.

## 126 **Cell and virus cultivation**

127 We cultivated Vero cells (African green monkey kidney cells - ATCC, CCL-81) in Eagle's  
128 minimum essential medium (EMEM) (Gibco, NY) supplemented with 10% fetal bovine serum  
129 (FBS) (Gibco, NY), penicillin, gentamycin, and amphotericin B. SARS-CoV-2 was isolated and  
130 propagated in Vero cells maintained in EMEM supplemented with 2% FBS in a Biosafety  
131 Laboratory Level-3 facility. Using the Reed-Muench method, we calculated the virus  
132 concentration for 50% tissue culture infective dose (TCID<sub>50</sub>) for further use in the microNT assay.

## 133 **Test viruses**

134 This study used 3 SARS-CoV-2 isolates as test viruses in the microNT assay. The purpose  
135 of doing so was to match the circulating virus at the time of blood specimen collection. The SARS-  
136 CoV-2 isolate designated hCoV-19/Thailand/MUMT-4/2020, clade O (GISAID accession number

137 EPI\_ISL\_493139) was used as the test virus for sera collected during the first epidemic wave,  
138 while hCoV-19/Thailand/MUMT-13/2021, clade GH (GISAID accession number  
139 EPI\_ISL\_6267810), and hCoV-19/Thailand/MUMT-36/2021, clade GRY (B.1.1.7) (GISAID  
140 accession number EPI\_ISL\_6267895) were used as the test viruses for the second and third  
141 epidemic waves, respectively.

## 142 **Experimental design**

143 This study employed the microNT assay and CLIA to detect anti-SARS antibodies in each  
144 test serum. When results of the two assays were concordant, the test serum was considered positive  
145 or negative for anti-SARS antibodies. In case of discordant results, the test serum was further  
146 investigated by IFA.

## 147 **Microneutralization assay**

148 We used the cytopathic effect (CPE)-based MicroNT assay to determine levels of  
149 neutralizing (NT) antibodies against SARS-CoV-2 in the test sera. The assay employed Vero cell  
150 monolayers in 96-well microculture plates and SARS-CoV-2 at a final concentration of 100  
151 TCID<sub>50</sub>/100 µl as the test virus. The method followed those described in our previous studies [9,  
152 10]. Briefly, the test serum was heat-inactivated and serially two-fold diluted from 1:10 to 1:1280.  
153 A 60 µl volume of each serum dilution was mixed with 60 µl of the test virus at a concentration of  
154 200 TCID<sub>50</sub>/100 µl. After an hour of incubation at 37 °C, a 100 µl volume of the virus-serum  
155 mixture was inoculated in duplicate into wells containing the Vero cell monolayer. The reaction  
156 plates were incubated at 37 °C for 3 days before reading the results. We defined the NT antibody  
157 titer as the highest reciprocal serum dilution that inhibited  $\geq 50\%$  CPE in the wells inoculated with  
158 the serum-virus mixture compared to wells with the uninfected cell control. A titer of 10 or greater  
159 was considered positive for NT antibody.

## 160 **Chemiluminescence immunoassay**

161 CLIA using Architect auto-analyzer (Abbott Laboratories, USA) is the two-step, fully  
162 automated immunoassay that qualitatively detected binding between the SARS-CoV-2  
163 nucleoprotein (N) antigen coated on paramagnetic microparticles and human IgG in the test sera.  
164 The assay required a minimal volume of 150  $\mu$ l of test serum to fill the reaction cup. Acridinium-  
165 conjugated anti-human IgG bound the human IgG and then emitted chemiluminescence signals  
166 quantitated as a relative light units (RLUs). It took about 1 hour to complete a test run. The level  
167 of SARS-CoV-2 IgG was directly correlated to the amount of RLUs. An index value was  
168 established based on the ratio between the RLU of the kit positive sample (S) and the calibrator  
169 (C). A test serum with an S/C ratio  $\geq 1.4$  was considered positive for the SARS-CoV-2 IgG.

## 170 **Indirect immunofluorescence assay**

171 The IFA staining method was previously described [10]. The assay employed SARS-CoV-  
172 2-infected Vero cells deposited on microscopic slides as the test antigens. To standardize the test  
173 antigen given the lot-to-lot variation, 50-75% of the infected cells must express N and spike (S1)  
174 proteins when stained with specific monoclonal antibodies (Sino Biological, Beijing, China).  
175 Human serum at a dilution of 1:10 in phosphate-buffered saline was incubated with the infected  
176 cell for 60 minutes at 37 °C and followed by addition of polyclonal rabbit anti-human IgA, IgG,  
177 IgM, Kappa, and Lambda conjugated with fluorescein isothiocyanate (Dako, Glostrup, Denmark)  
178 in Evan's blue solution for 60 minutes. The stained viral antigens in the cytoplasm of the infected  
179 cells appeared apple green when examined under a fluorescence microscope.

## 180 **Statistical analysis**



181 R square ( $R^2$ ), mean, and standard deviation (SD) were determined, and figures were drawn  
182 using GraphPad Prism version 8.4.3 for Windows (GraphPad Software, La Jolla, California, USA).  
183 The McNemar test was carried out and 95% confidence interval (95% CI) calculated by SPSS  
184 Statistic software version 18.0.

185

## 186 **Results**

### 187 **Prevalence of anti-SARS-CoV-2 antibodies in COVID-19 patients by** 188 **time**

189 Using microNT assay and Architect IgG, and IFA for confirmation, anti-SARS-CoV-2  
190 antibodies were detected in 124 (87.3%) of 142 COVID-19 patients from the first epidemic wave.  
191 Eighty-eight percent (15 of 17) of the patients had antibody responses at 8 days after onset of  
192 symptoms. Positivity rose further to 94.1% (16 of 17) at 15-21 days, 100% (19 of 19) at 22-30  
193 days, and 97% (32 of 33) at 31-60 days after onset of symptoms (Fig 2). NT antibodies persisted  
194 for at least 8 months as found in all 7 participants with history of COVID-19, while IgG specific  
195 to N protein was found in only 3 of these 7 cases. Nevertheless, the numbers of antibody-positive  
196 cases detected by microNT assay and CLIA for IgG were not significantly different (McNemar  
197 test;  $p = 0.65$ ). On the other hand, the NT antibody titers were not well correlate with the IgG levels  
198 ( $R^2 = 0.6042$ ) (Fig 3).

199

200 **Fig 2. Antibody response in COVID-19 patients at different time points after onset of disease**  
201 **symptoms.**

202 **Fig 3. Correlation between NT antibody titers and Architect IgG indices in COVID-19**  
 203 **patients.**

204  
 205 **Prevalence of anti-SARS-CoV-2 antibodies in participants with**  
 206 **selected occupations**

207 The early COVID-19 outbreak in Thailand showed that some occupations had higher risk  
 208 of infection than did others. We conducted serosurveillance for anti-SARS-CoV-2 antibodies in  
 209 2113 participants with at-risk occupations (health personnel, airport officers, public transport  
 210 drivers and workers in entertainment venues) as shown in Table 1. The serum samples from health  
 211 personnel were collected during the three epidemic waves, while the others were collected from  
 212 the first or second epidemic wave. The result showed that none of the 2113 participants had anti-  
 213 SARS-CoV-2 antibodies, except for 3 (0.44%) of 682 workers from the entertainment venues.

214  
 215 **Table 1. Seroprevalence of anti-SARS-CoV-2 antibodies in participants with at-risk**  
 216 **occupations.**

| Group                                                | Epidemic wave              |                                       |                           | Subtotal                               |
|------------------------------------------------------|----------------------------|---------------------------------------|---------------------------|----------------------------------------|
|                                                      | Jan – December<br>14, 2020 | December 15, 2020<br>– March 31, 2021 | April 1 – May<br>31, 2021 |                                        |
|                                                      | No. pos/<br>No. tested     | No. pos/<br>No. tested                | No. pos/<br>No. tested    |                                        |
| Health personnel                                     | 0/187                      | 0/13                                  | 0/272                     | 0/472                                  |
| Airport officers                                     | 0/493                      | -                                     | -                         | 0/493                                  |
| Public transport<br>drivers                          | 0/455                      | 0/11                                  | -                         | 0/466                                  |
| Entertainment<br>workers                             | 3/682                      | -                                     | -                         | 3/682 (0.44%)<br>95% CI = 0.08 – 1.29% |
| <b>Total = 3/2113 (0.14%), 95% CI = 0.03 – 0.42%</b> |                            |                                       |                           |                                        |

217

## 218 **Prevalence of anti-SARS-CoV-2 antibodies in people at risk**

219 We conducted serosurveillance in 1856 Thai people at risk by sharing the same workplaces  
 220 or living in the same community with COVID-19 cases. The investigation showed that 1.9% (11  
 221 of 574), 1.5% (6 of 388), and 7.5% (11 of 147) of people in Bangkok were seropositive for anti-  
 222 SARS-CoV-2 antibody during the three epidemic waves, respectively. In Chiang Mai, 1.3% (10  
 223 of 747) of participants were seropositive during the first epidemic wave; 7 of them provided  
 224 histories of having COVID-19 during the prior 8 months (Table 2).

225

226 **Table 2. Seroprevalence of anti-SARS-CoV-2 antibodies in participants who shared**  
 227 **workplaces or lived in communities with reported COVID-19 cases.**

| Province                                              | Epidemic wave                          |                                       |                                          |
|-------------------------------------------------------|----------------------------------------|---------------------------------------|------------------------------------------|
|                                                       | Jan – December 14, 2020                | December 15, 2020 – March 31, 2021    | April 1 – May 31, 2021                   |
|                                                       | No. pos/No. tested                     | No. pos/No. tested                    | No. pos/No. tested                       |
| Bangkok                                               | 11/574 (1.9%)<br>95% CI = 0.95 – 3.43% | 6/388 (1.5%)<br>95% CI = 0.56 – 3.37% | 11/147 (7.5%)<br>95% CI = 3.72 – 13.40%  |
| Chiang Mai                                            | 10/747 (1.3%)<br>95% CI = 0.64 – 2.46% | -                                     | -                                        |
| <b>Subtotal</b>                                       | 21/1321(1.6%)<br>95% CI = 0.98 – 2.43% | 6/388 (1.5)<br>95% CI = 0.56 – 3.37%  | 11*/147 (7.5%)<br>95% CI = 3.72 – 13.40% |
| <b>Total = 38/1856 (2.04%), 95% CI = 1.44 – 2.81%</b> |                                        |                                       |                                          |

228 \* 7 participants provided history of COVID-19 at 8 months previously

229

230 **Serological profiles of anti-SARS-CoV-2 antibodies in participants at**  
231 **risk**

232 We display in Tables 1 and 2 the serological profiles of anti-SARS-CoV-2 antibodies in  
233 3969 participants, grouped as 2113 people at risk by occupation (Table 1), and 1856 people at risk  
234 by sharing workplaces or living community with COVID-19 patients. Using microNT assay and  
235 Architect IgG, followed by IFA validation, 41 of 3969 (1.0%) were seropositive for anti-SARS-  
236 CoV-2 antibodies. The number of seropositive cases detected by Architect IgG was slightly lower  
237 than that detected by microNT, but not significantly different (McNemar test;  $p = 0.54$ ).  
238 Furthermore, the NT antibody titers were not well correlated with the IgG levels obtained by CLIA  
239 ( $R^2 = 0.5908$ ) (Fig 4).

240

241 **Fig 4. Correlation between NT antibody titers and Architect IgG indices in Thai people.**

242

243 **Prevalence of anti-SARS-CoV-2 antibody in travelers returning from**  
244 **high-risk areas**

245 This study conducted serosurveillance in 553 Thai citizens returning after extended duties  
246 in countries with high-prevalence of SARS-CoV-2 infection between May and October 2020. Our  
247 results showed seroprevalences of 6.5 – 47.0% depending on the country (Table 3).

248

249 **Table 3. Seroprevalence of anti-SARS-CoV-2 antibodies in Thais returning from extended**  
250 **periods of work in high-risk countries.**

| Country                                                 | Date of blood collection | No. pos/No. tested (%)                     |
|---------------------------------------------------------|--------------------------|--------------------------------------------|
| Qatar                                                   | May - Jun 2020           | 14/215 (6.5%)<br>95% CI = 3.55 – 10.93%    |
| Kuwait                                                  | May - Jun 2020           | 101/215 (47.0%)<br>95% CI = 38.27 – 57.08% |
| Sudan                                                   | Oct 2020                 | 36/77 (46.8%)<br>95% CI = 32.75 – 64.72%   |
| Others                                                  | Jun - Oct 2020           | 4/46 (8.7%)<br>95% CI = 2.28 – 22.36%      |
| <b>Total = 155/553 (28.0%), 95% CI = 23.79 – 32.80%</b> |                          |                                            |

251

252

## 253 **Discussion**

254 We employed 3 serological techniques to detect anti-SARS-CoV-2 antibodies in this  
255 cross-sectional surveillance study. The NT antibodies were directed against the neutralizing  
256 epitopes present in the receptor-binding domain (RBD), N terminal domain (NTD), and S2 domain  
257 in the S protein [11-15]; Architect IgG was directed against the N antigen which is a more  
258 conserved protein [16, 17]. NT antibodies are markers of protective immunity, but IgG against N  
259 protein is not. MicroNT assay and Architect IgG were used to investigate every serum sample, and  
260 the result was concluded to be negative when both methods yielded concordant results. In the case  
261 of discordant results, IFA (which employed the test antigens from both the S and N proteins) was  
262 used to resolve discordance. Overall, the numbers of seropositive participants determined by

263 microNT assay and Architect IgG were not significantly different. Nevertheless, NT antibody titers  
264 were not well correlated with the IgG levels.

265 Our study in COVID-19 patients showed that 15 of 17 (88.2%) patients mounted a  
266 detectable antibody response 8-14 days after onset of symptoms. However, the prevalence  
267 increased to as high as 94-100% in the subsequent 45 days. In addition, we found that anti-SARS-  
268 CoV-2 antibodies persisted for at least 8 months in all 7 individuals who had a history of COVID-  
269 19, while Architect IgG to N protein did not last that long. This is similar to the findings of others  
270 who reported 8-month antibody persistence in mild SARS-CoV-2 infections [18] and up to one  
271 year in one study [19].

272 We investigated 3969 blood samples from multiple groups of participants between May  
273 14, 2020 and May 21, 2021, the duration spanning two epidemic waves and part of the third wave.  
274 Of 2113 participants with the at-risk occupations (472 health providers, 493 airport officers, 466  
275 public transport drivers, and 682 workers in entertainment venues), only 0.14% (all 3 from the last  
276 group) had detectable anti-SARS-CoV-2 antibodies. Furthermore, of 1856 participants who shared  
277 workplaces or communities, only 38 (2.04%) were seropositive. Over time, the number of  
278 participants in Bangkok who had anti-SARS-CoV-2 antibodies increased from 1.9 to 1.5 and 7.5%  
279 during the 3 epidemic waves, respectively. Our seroprevalence data strongly supported the  
280 prevalence of infection reported by the MoPH, i.e., the cumulative numbers of 4237 cases with 60  
281 deaths at the end of the first epidemic wave (from Jan to Dec 14, 2020), 28863 cases with 94 deaths  
282 at the end of the second epidemic wave (from Dec 15, 2020 to Mar 31, 2021), and 159792 cases  
283 with 1031 deaths (from Apr 1 to May 31, 2021).

284 Thailand received worldwide recognition for keeping the first epidemic wave well  
285 controlled. During the first epidemic wave, cumulative case count per population was in the 10<sup>th</sup>

286 percentile of countries globally [20]. As part of the control policy, the government provided  
287 treatment and hospitalization, quarantine, and laboratory diagnosis of SARS-CoV-2 infection at  
288 no cost. The prevalence of infection during the wave peaked in March 2020, followed by a sharp  
289 decline. None or less than 10 locally transmitted cases were detected daily from the middle of May  
290 through the end of the first epidemic wave. In total, there were 4237 cases with 60 deaths by the  
291 end of the first epidemic wave (December 14, 2020). The high seroprevalence (6.5 – 47%) in Thai  
292 citizens returning from abroad suggested the seriousness of the outbreaks in those regions.  
293 Nevertheless, high infection rates may be partly due to sharing workplaces among these  
294 participants.

295 Management of non-pharmaceutical interventions in Thailand was efficient. No people  
296 protested against wearing masks in public. They followed the suggestions on soft locked down,  
297 social distancing, working from home, and personnel hygiene. A vital success came from the  
298 assistance of approximately one million village health volunteers who are part of the public health  
299 system and worked nationwide since the time of H5N1 avian influenza. These volunteers assist  
300 with health education, active case finding, and communication between health authorities and  
301 communities. For example, each volunteer is assigned to take care of approximately 10 houses.  
302 Nevertheless, the occurrence of the second and third epidemic waves came very abruptly, from  
303 introduction of the newer variants, the GH clade and the Alpha variant, respectively. We cannot  
304 deny that these outbreaks due to illegal activities, including cross border movement of migrant  
305 workers and gamblers.

306 Before the third epidemic wave trended down, the outbreak situation of SARS-CoV-2  
307 became worse due to introduction of the Delta variant (that is more transmissible and virulent) to  
308 seed a fourth epidemic wave. The infection rate peaked in August 2021, when more than 20000

309 cases were reported daily for weeks before slowly declining. However, non-pharmaceutical  
310 intervention appears inadequate to control the Delta variant, and access to vaccines has not been  
311 easy. The MoPH first launched vaccinations for health providers in late February 2021.

312 At present, seroprevalence studies in the Thai population will encounter difficulties in  
313 differentiating between natural infection and vaccination. Nevertheless, our seroprevalence data  
314 validate the reported lack of circulation of SARS-CoV-2 in Thailand during the first year of the  
315 pandemic.

316

## 317 **Acknowledgements**

318 We thank Abbott Laboratories for providing Chemiluminescence test kits. We also thank  
319 Chinda Kanoksinsombat, Tipsuda Chanmanee, Rumporn Kularb, and Charlearnsak Thapyotha for  
320 laboratory assistance.

321

## 322 **References**

- 323 1. Sirilak S, editor. Thailand's experience in the COVID-19 response [Internet]. Ministry of  
324 Public Health, Thailand. Aug 2020 [Cited 2021 October 31]. Available from:  
325 <https://ddc.moph.go.th/viralpneumonia/eng/file/pubdoc/LDoc9.pdf>.
- 326 2. Win A. Rapid rise of COVID-19 second wave in Myanmar and implications for the Western  
327 Pacific region. *QJM*. 2020;113:856-57.
- 328 3. Cheepsattayakorn A, Cheepsattayakorn R, Siriwanarangsun P. New waves of COVID-19 in  
329 Thailand, Cambodia and Myanmar. *Am J Intern Med*. 2021;9: 114-20.



- 330 4. WHO Cambodia. Cambodia Coronavirus Disease 2019 (COVID-19) Situation Report #35.  
331 2021 March 01 [Cited 2021 October 31]. Available from:  
332 [https://www.who.int/cambodia/internal-publications-detail/covid-19-joint-who-moh-situation-](https://www.who.int/cambodia/internal-publications-detail/covid-19-joint-who-moh-situation-report-35)  
333 [report-35](https://www.who.int/cambodia/internal-publications-detail/covid-19-joint-who-moh-situation-report-35).
- 334 5. Tribune B. First local cases of contagious Indian variant discovered among construction  
335 workers in Lak si. Bangkok Tribune Online News Agency. 2021 May 21 [Cited 2021 October  
336 31]. Available from: [https://bkktribune.com/first-local-cases-of-contagious-indian-variant-](https://bkktribune.com/first-local-cases-of-contagious-indian-variant-discovered-among-construction-workers-in-lak-si/)  
337 [discovered-among-construction-workers-in-lak-si/](https://bkktribune.com/first-local-cases-of-contagious-indian-variant-discovered-among-construction-workers-in-lak-si/).
- 338 6. Sah P, Fitzpatrick MC, Zimmer CF, Abdollahi E, Juden-Kelly L, Moghadas SM, et al.  
339 Asymptomatic SARS-CoV-2 infection: A systematic review and meta-analysis. *Proc Natl Acad*  
340 *Sci U S A*. 2021;118:e2109229118.
- 341 7. Gallais F, Gantner P, Bruel T, Velay A, Planas D, Wendling MJ, et al. Evolution of antibody  
342 responses up to 13 months after SARS-CoV-2 infection and risk of reinfection. *EBioMedicine*.  
343 2021;71:103561.
- 344 8. Legros V, Denolly S, Vogrig M, Boson B, Siret E, Rigaille J, et al. A longitudinal study of  
345 SARS-CoV-2-infected patients reveals a high correlation between neutralizing antibodies and  
346 COVID-19 severity. *Cell Mol Immunol*. 2021;18:318-327.
- 347 9. Lerdsamran H, Prasertsopon J, Mungaomklang A, Klinmalai C, Noisamdaeng P, Sangsiriwut  
348 K, et al. Seroprevalence of antibodies to enterovirus 71 and coxsackievirus A16 among people  
349 of various age groups in a northeast province of Thailand. *Virol J*. 2018;15:158.
- 350 10. Lerdsamran H, Mungaomklang A, Iamsirithaworn S, Prasertsopon J, Prasert K, Intalapaporn P,  
351 et al. Evaluation of different platforms for the detection of anti-SARS coronavirus-2 antibodies,  
352 Thailand. *BMC Infect Dis*. 2021;21:1213.

- 353 11. Premkumar L, Segovia-Chumbez B, Jadi R, Martinez DR, Raut R, Markmann A, et al. The  
354 receptor-binding domain of the viral spike protein is an immunodominant and highly specific  
355 target of antibodies in SARS-CoV-2 patients. *Sci Immunol.* 2020;5:eabc8413.
- 356 12. Brouwer PJM, Caniels TG, van der Straten K, Snitselaar JL, Aldon Y, Bangaru S, et al. Potent  
357 neutralizing antibodies from COVID-19 patients define multiple targets of vulnerability. *Science.*  
358 2020;369:643-50.
- 359 13. Chi X, Yan R, Zhang J, Zhang G, Zhang Y, Hao M, et al. A neutralizing human antibody binds  
360 to the N-terminal domain of the Spike protein of SARS-CoV-2. *Science.* 2020;369:650-55.
- 361 14. Keng CT, Zhang A, Shen S, Lip KM, Fielding BC, Tan TH, et al. Amino acids 1055 to 1192 in  
362 the S2 region of severe acute respiratory syndrome coronavirus S protein induce neutralizing  
363 antibodies: implications for the development of vaccines and antiviral agents. *J Virol.*  
364 2005;79:3289-96.
- 365 15. Yang H, Rao Z. Structural biology of SARS-CoV-2 and implications for therapeutic  
366 development. *Nat Rev Microbiol.* 2021;19:685-700.
- 367 16. Dutta NK, Mazumdar K, Gordy JT. The Nucleocapsid Protein of SARS-CoV-2: a Target for  
368 Vaccine Development. *J Virol.* 2020;94:e00647-20.
- 369 17. Negara MRM, Krissanti I, Pradini GW. Analysis of SARS-CoV-2 nucleocapsid protein  
370 sequence variations in ASEAN countries. *Med J Indones.* 2021;30:89-95.
- 371 18. Perez-Saez J, Zaballa ME, Yerly S, Andrey DO, Meyer B, Eckerle I, et al. Persistence of anti-  
372 SARS-CoV-2 antibodies: immunoassay heterogeneity and implications for serosurveillance.  
373 *Clin Microbiol Infect.* 2021;27:1695.e7-12.

374 19. Haveri A, Ekström N, Solastie A, Virta C, Österlund P, Isosaari E, et al. Persistence of  
375 neutralizing antibodies a year after SARS-CoV-2 infection in humans. *Eur J Immunol.*  
376 2021;51:3202-13.

377 20. Our World in Data. Thailand: Coronavirus Pandemic Country Profile. 2021 [Cited 2021  
378 October 20]. Available from: <https://ourworldindata.org/coronavirus/country/thailand>.

379

380

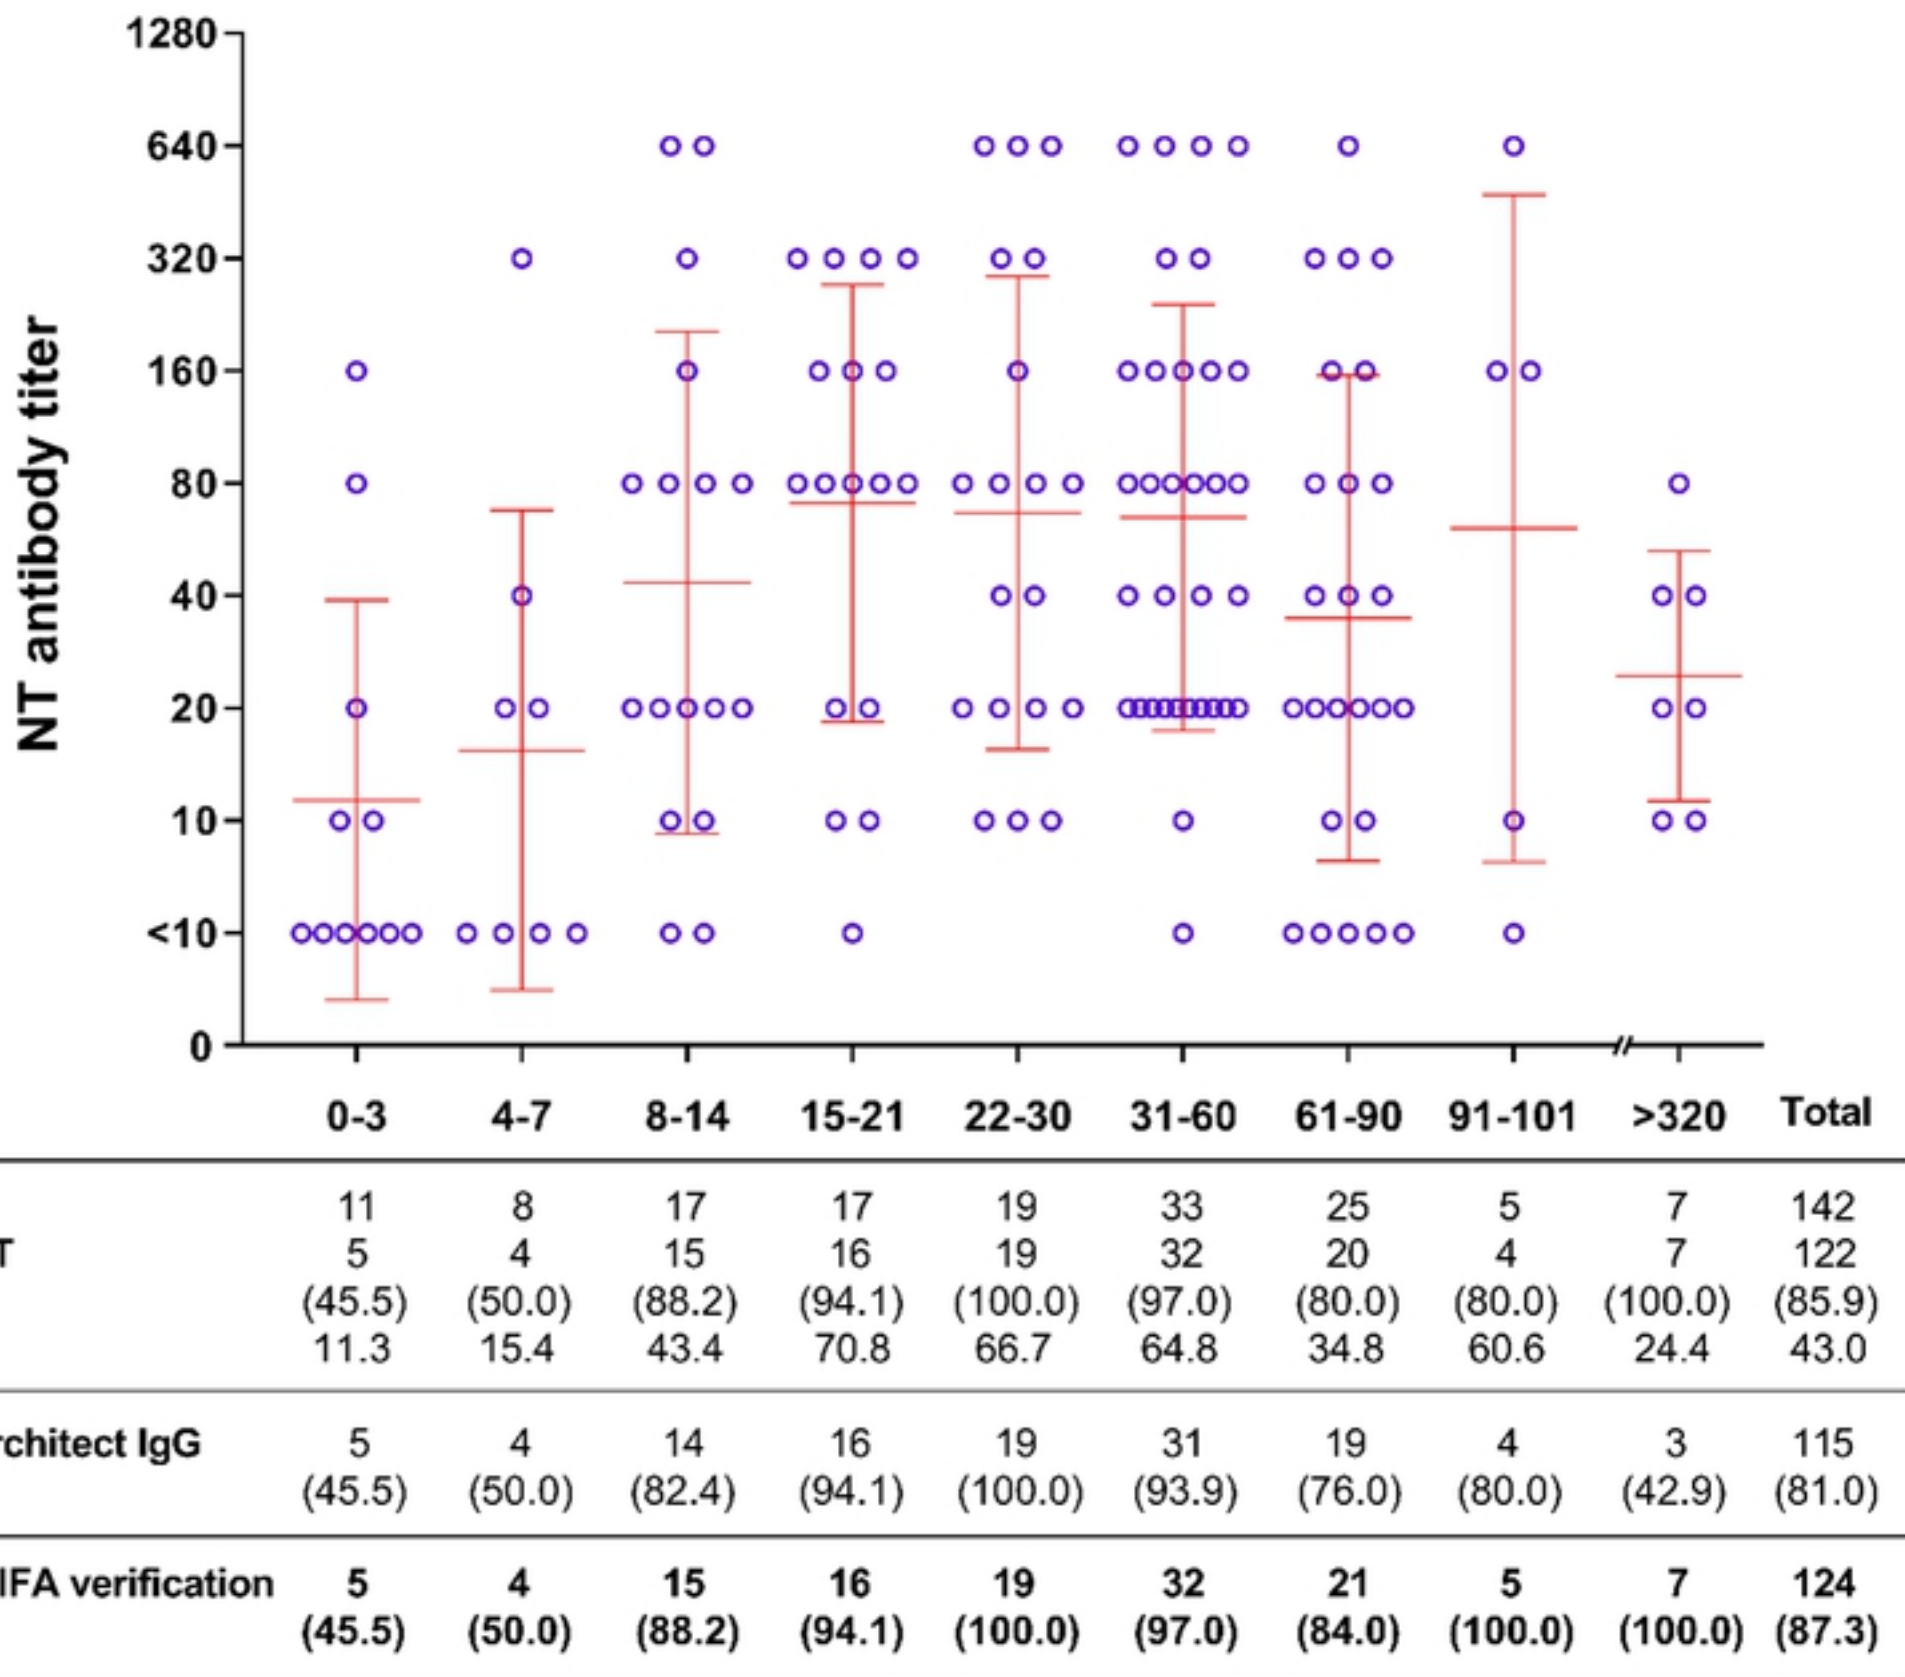

Fig2

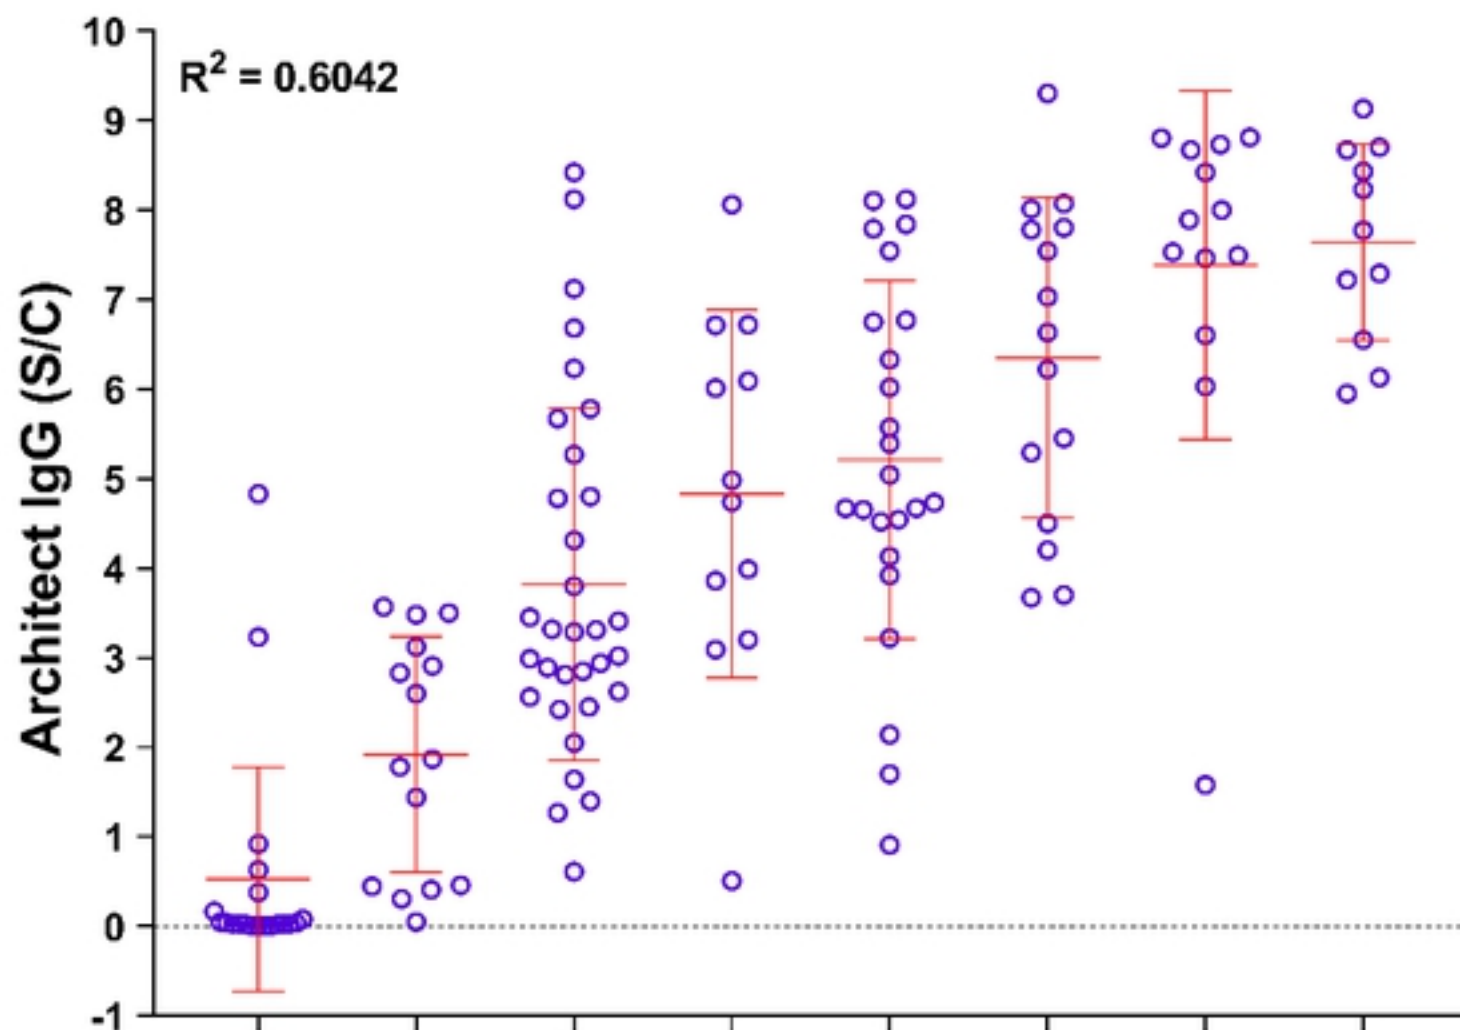

| NT antibody titer                    | <10      | 10        | 20        | 40        | 80        | 160        | 320        | 640        | No. pos/Total (%) |
|--------------------------------------|----------|-----------|-----------|-----------|-----------|------------|------------|------------|-------------------|
| Number of cases                      | 20       | 15        | 32        | 12        | 24        | 15         | 13         | 11         | 122/142 (85.9)    |
| Number positive by Architect IgG (%) | 2 (10.0) | 10 (66.7) | 30 (93.8) | 11 (91.7) | 23 (95.8) | 15 (100.0) | 13 (100.0) | 11 (100.0) | 115/142 (81.0)    |
| Mean of index values (S/C)           | 0.53     | 1.9       | 3.8       | 4.8       | 5.2       | 6.3        | 7.4        | 7.6        | 4.4               |

Fig3

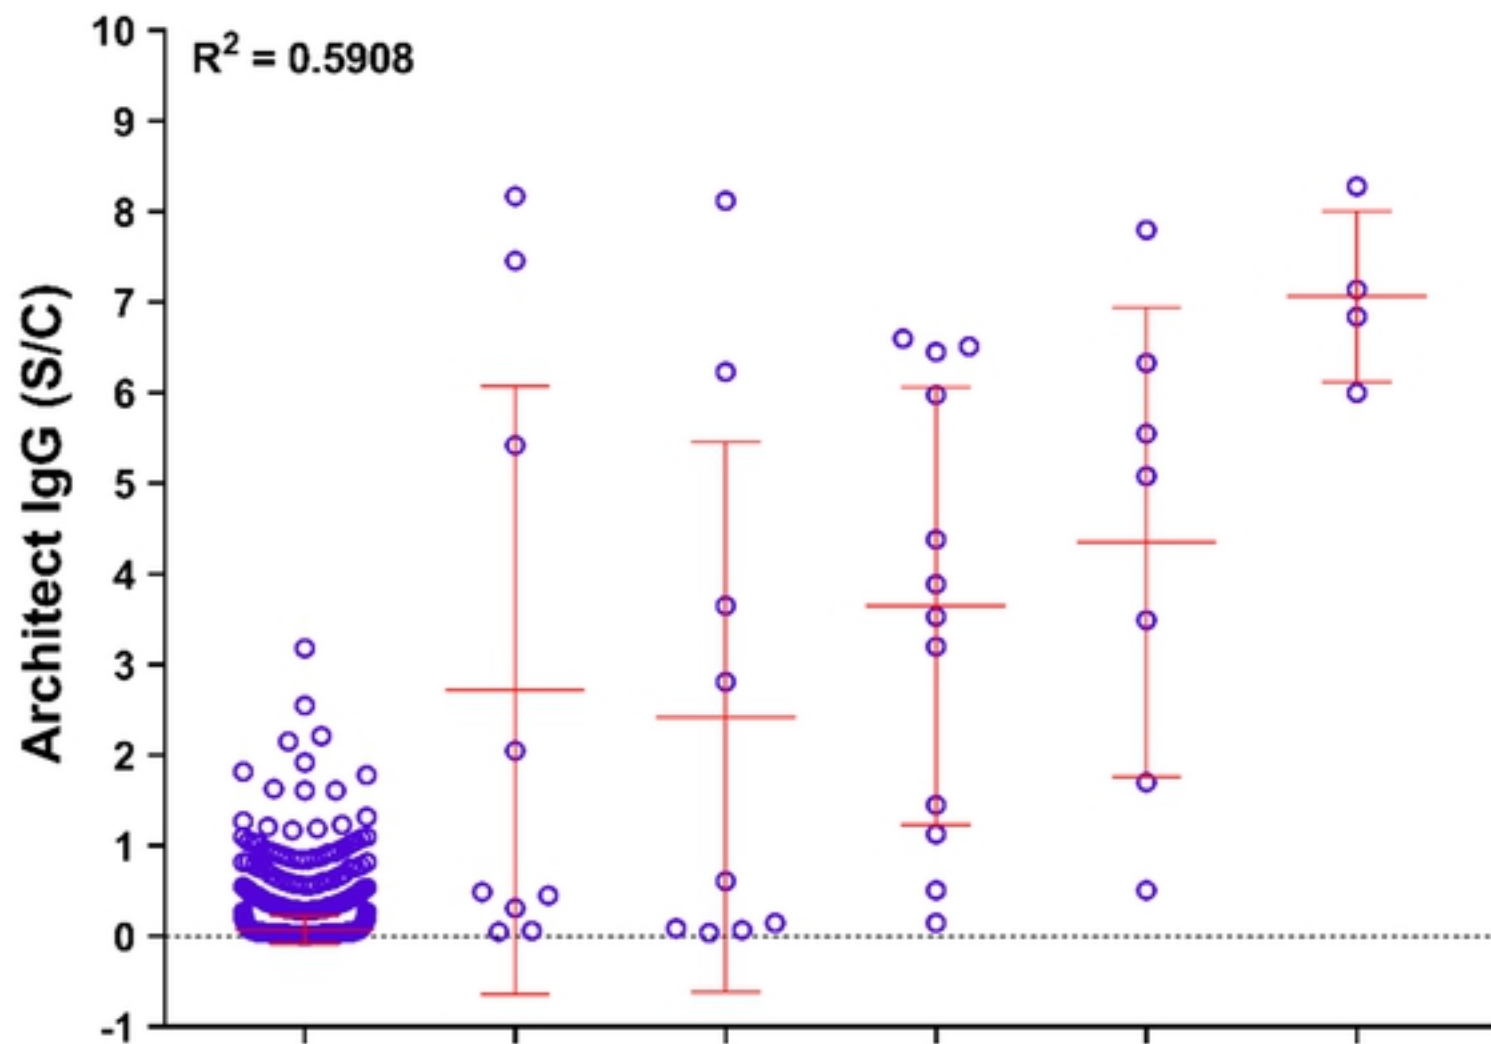

NT antibody titer  
Number of cases

<10  
3928

10  
9

20  
9

40  
12

80  
7

160  
4

No. pos/Total (%)  
41/3969 (1.0)

Number positive by Architect IgG  
(%)

10  
(0.3)

4  
(44.4)

4  
(44.4)

9  
(75.0)

6  
(85.7)

4  
(100.0)

37/3969  
(0.9)

Mean of index values (S/C)

0.07

2.7

2.4

3.6

4.4

7.1

0.11

Fig4

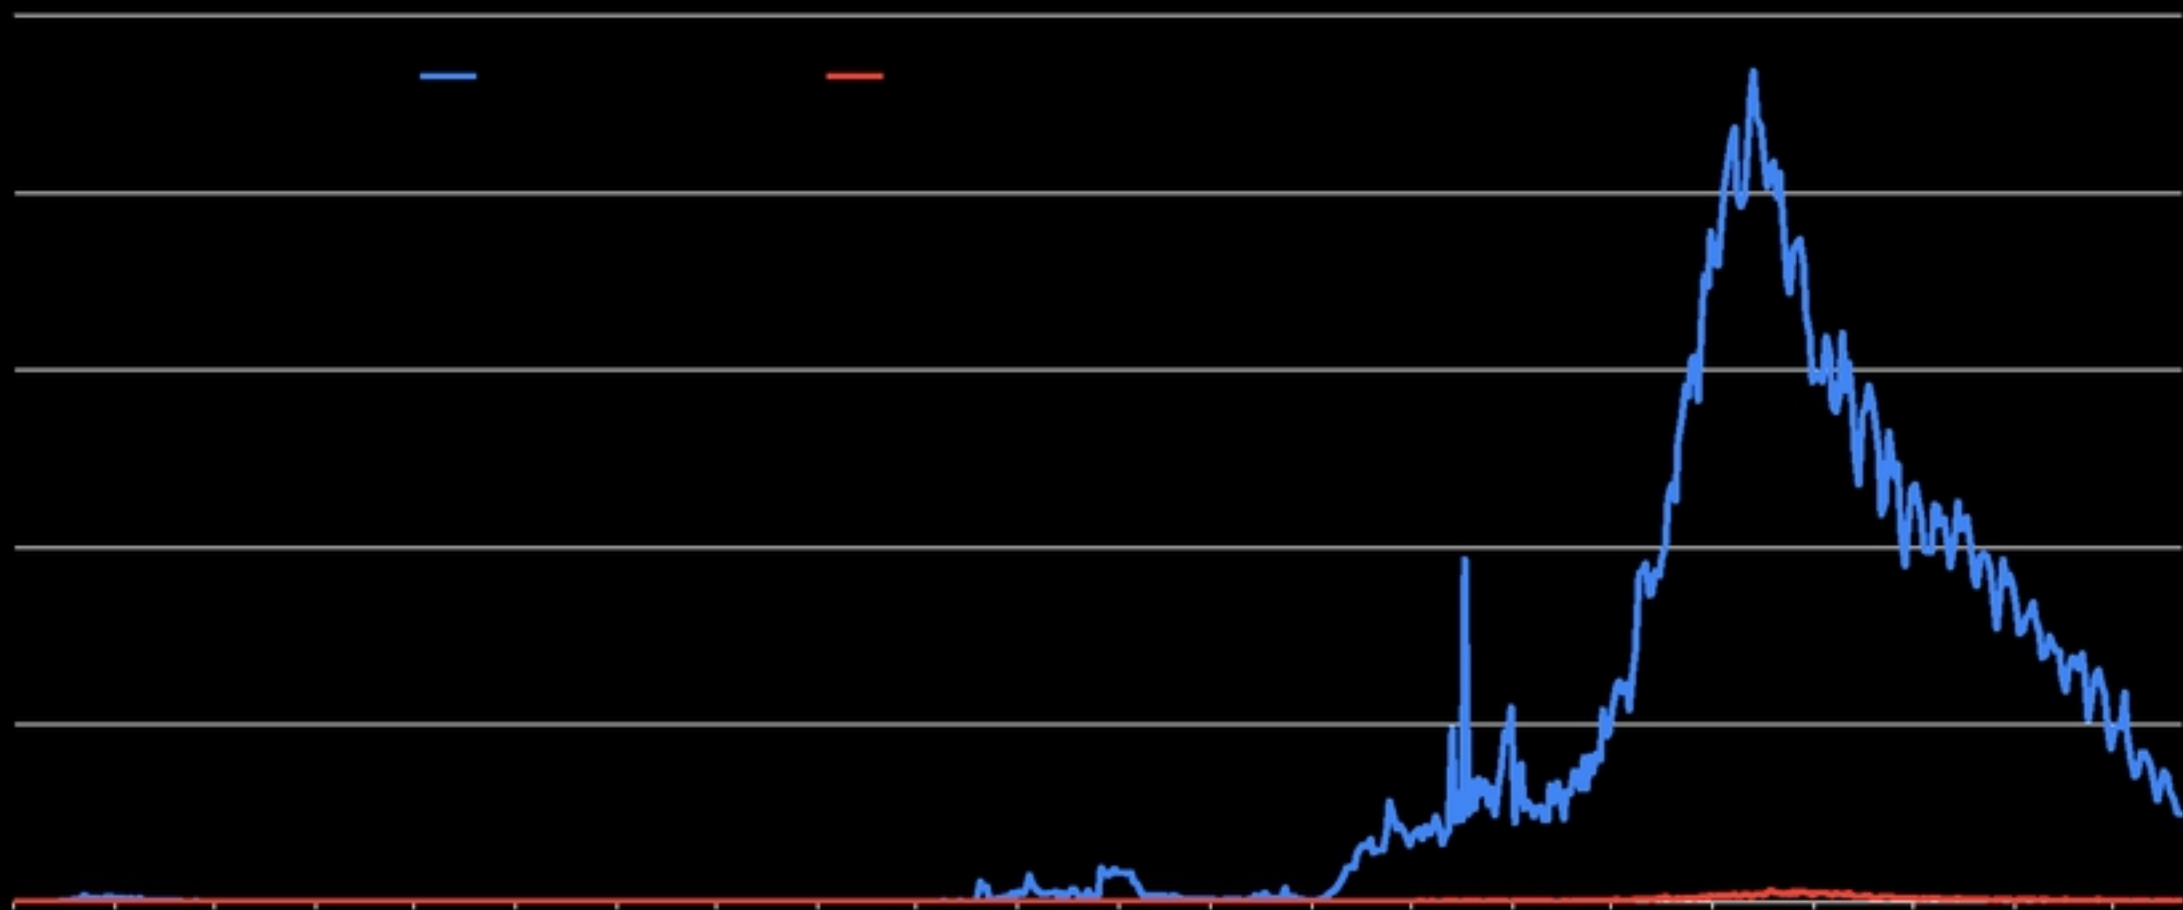

Fig1
